# Supplementary material for: Genetic and transcriptomic dissection of the fiber length trait from a cotton (Gossypium hirsutum L.) MAGIC population
Source: PubMed Central journal article supplement (PMC6366115; doi:10.1186/s12864-019-5427-5), 2019-02-06

**A**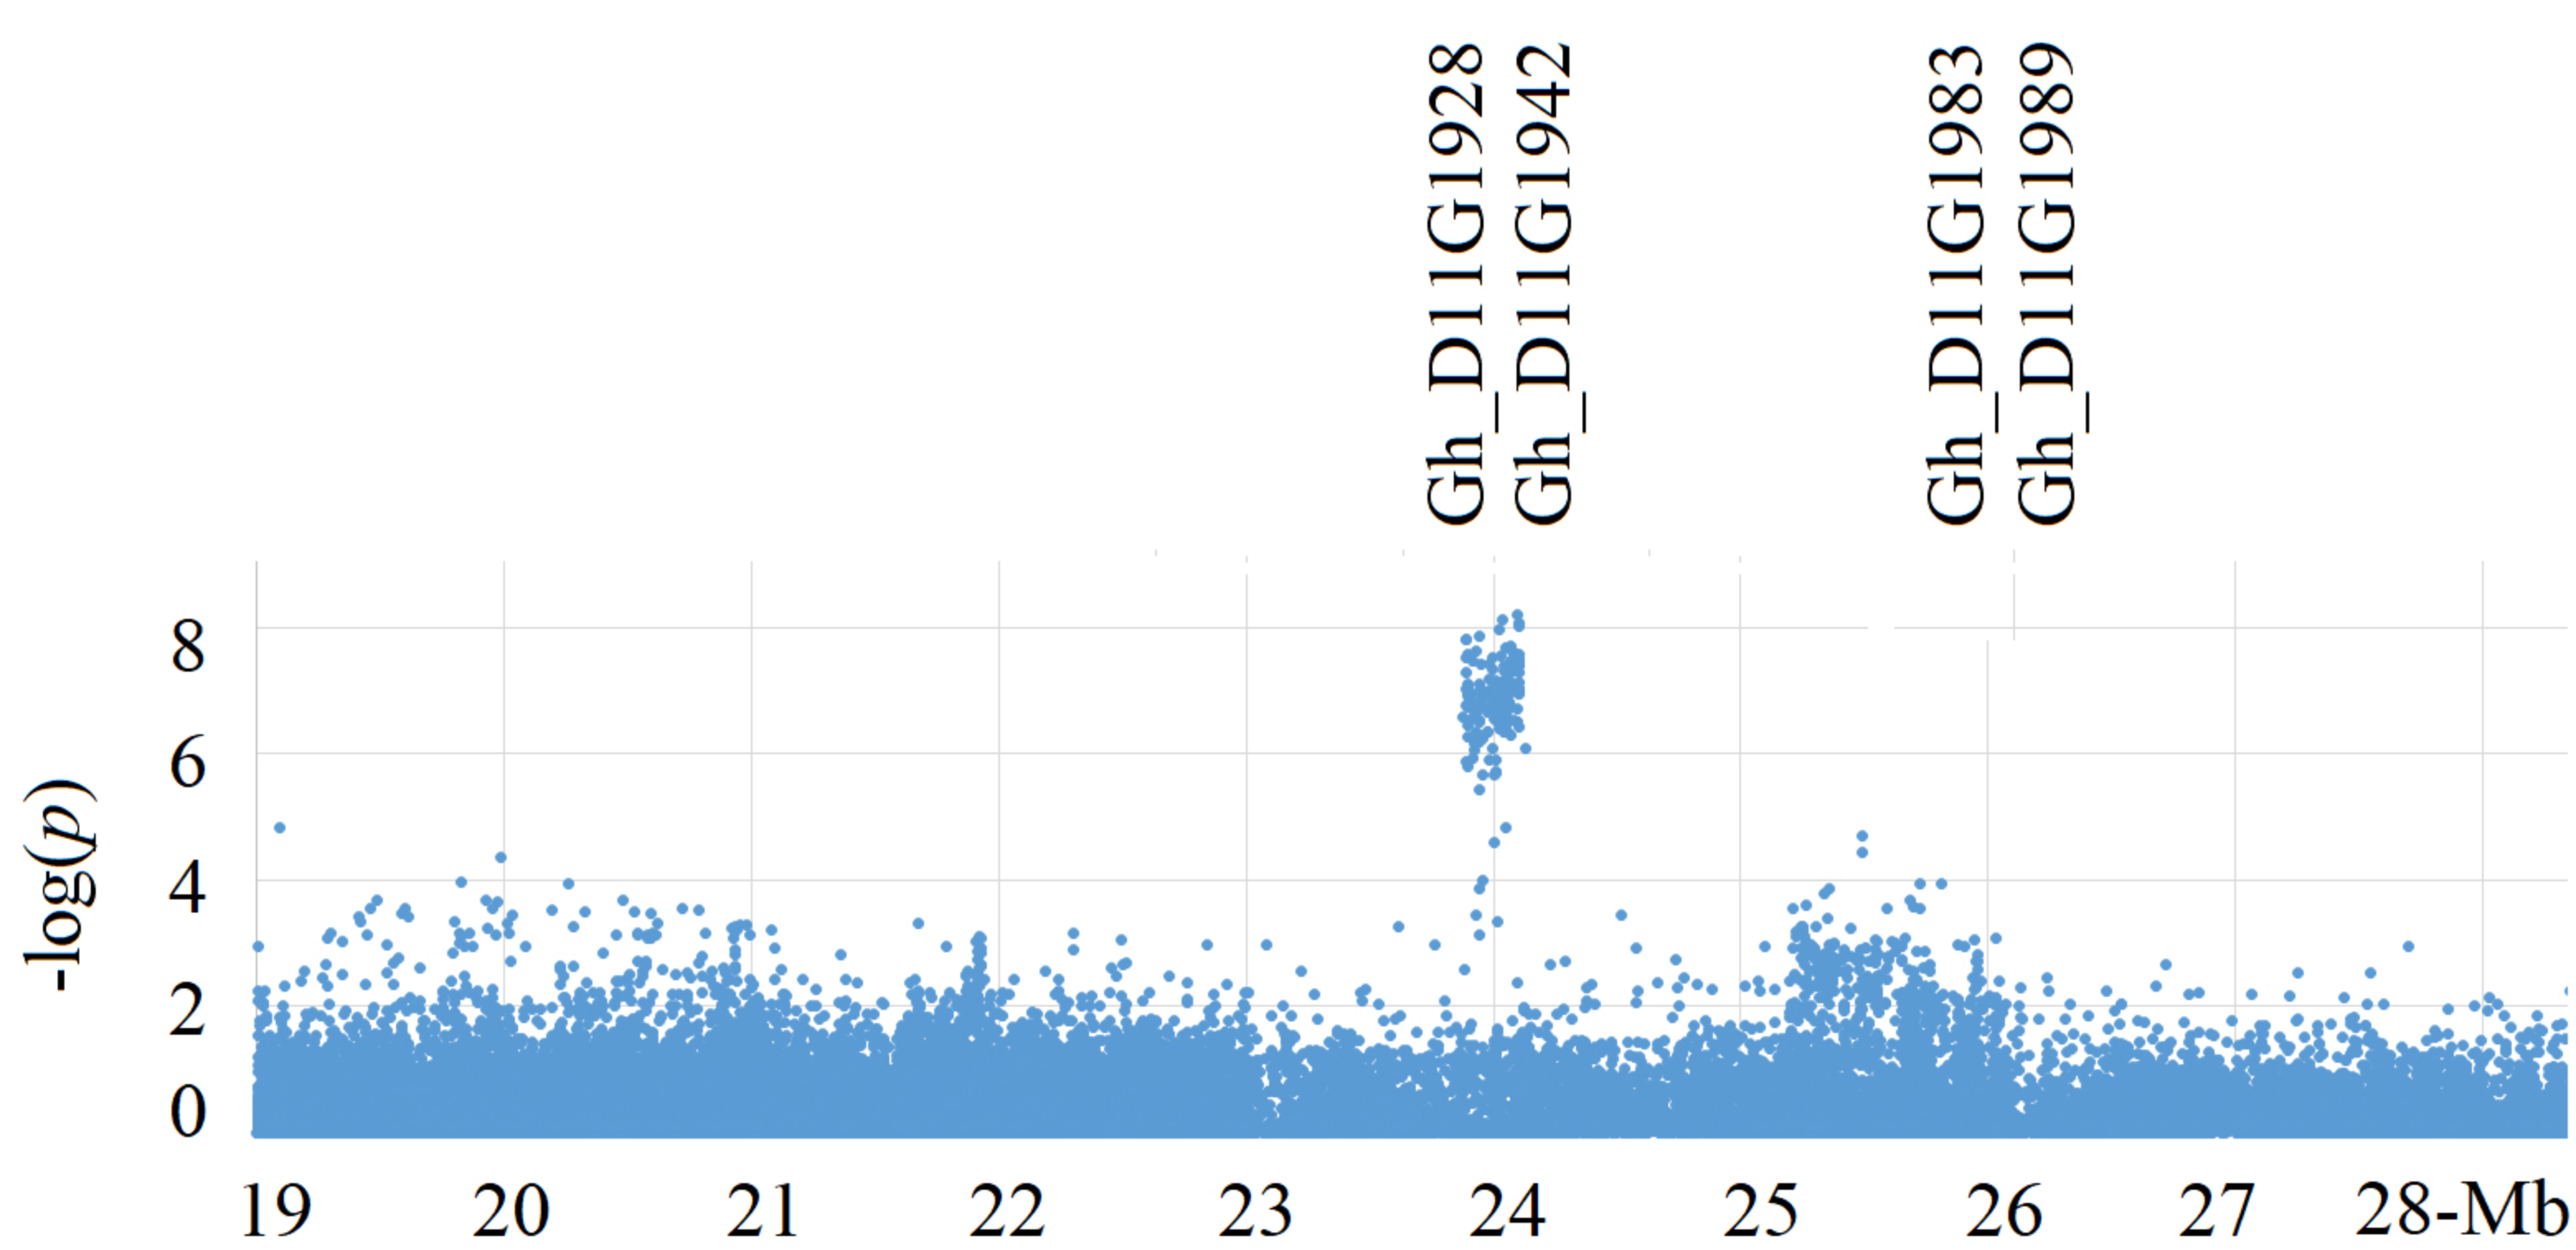**B**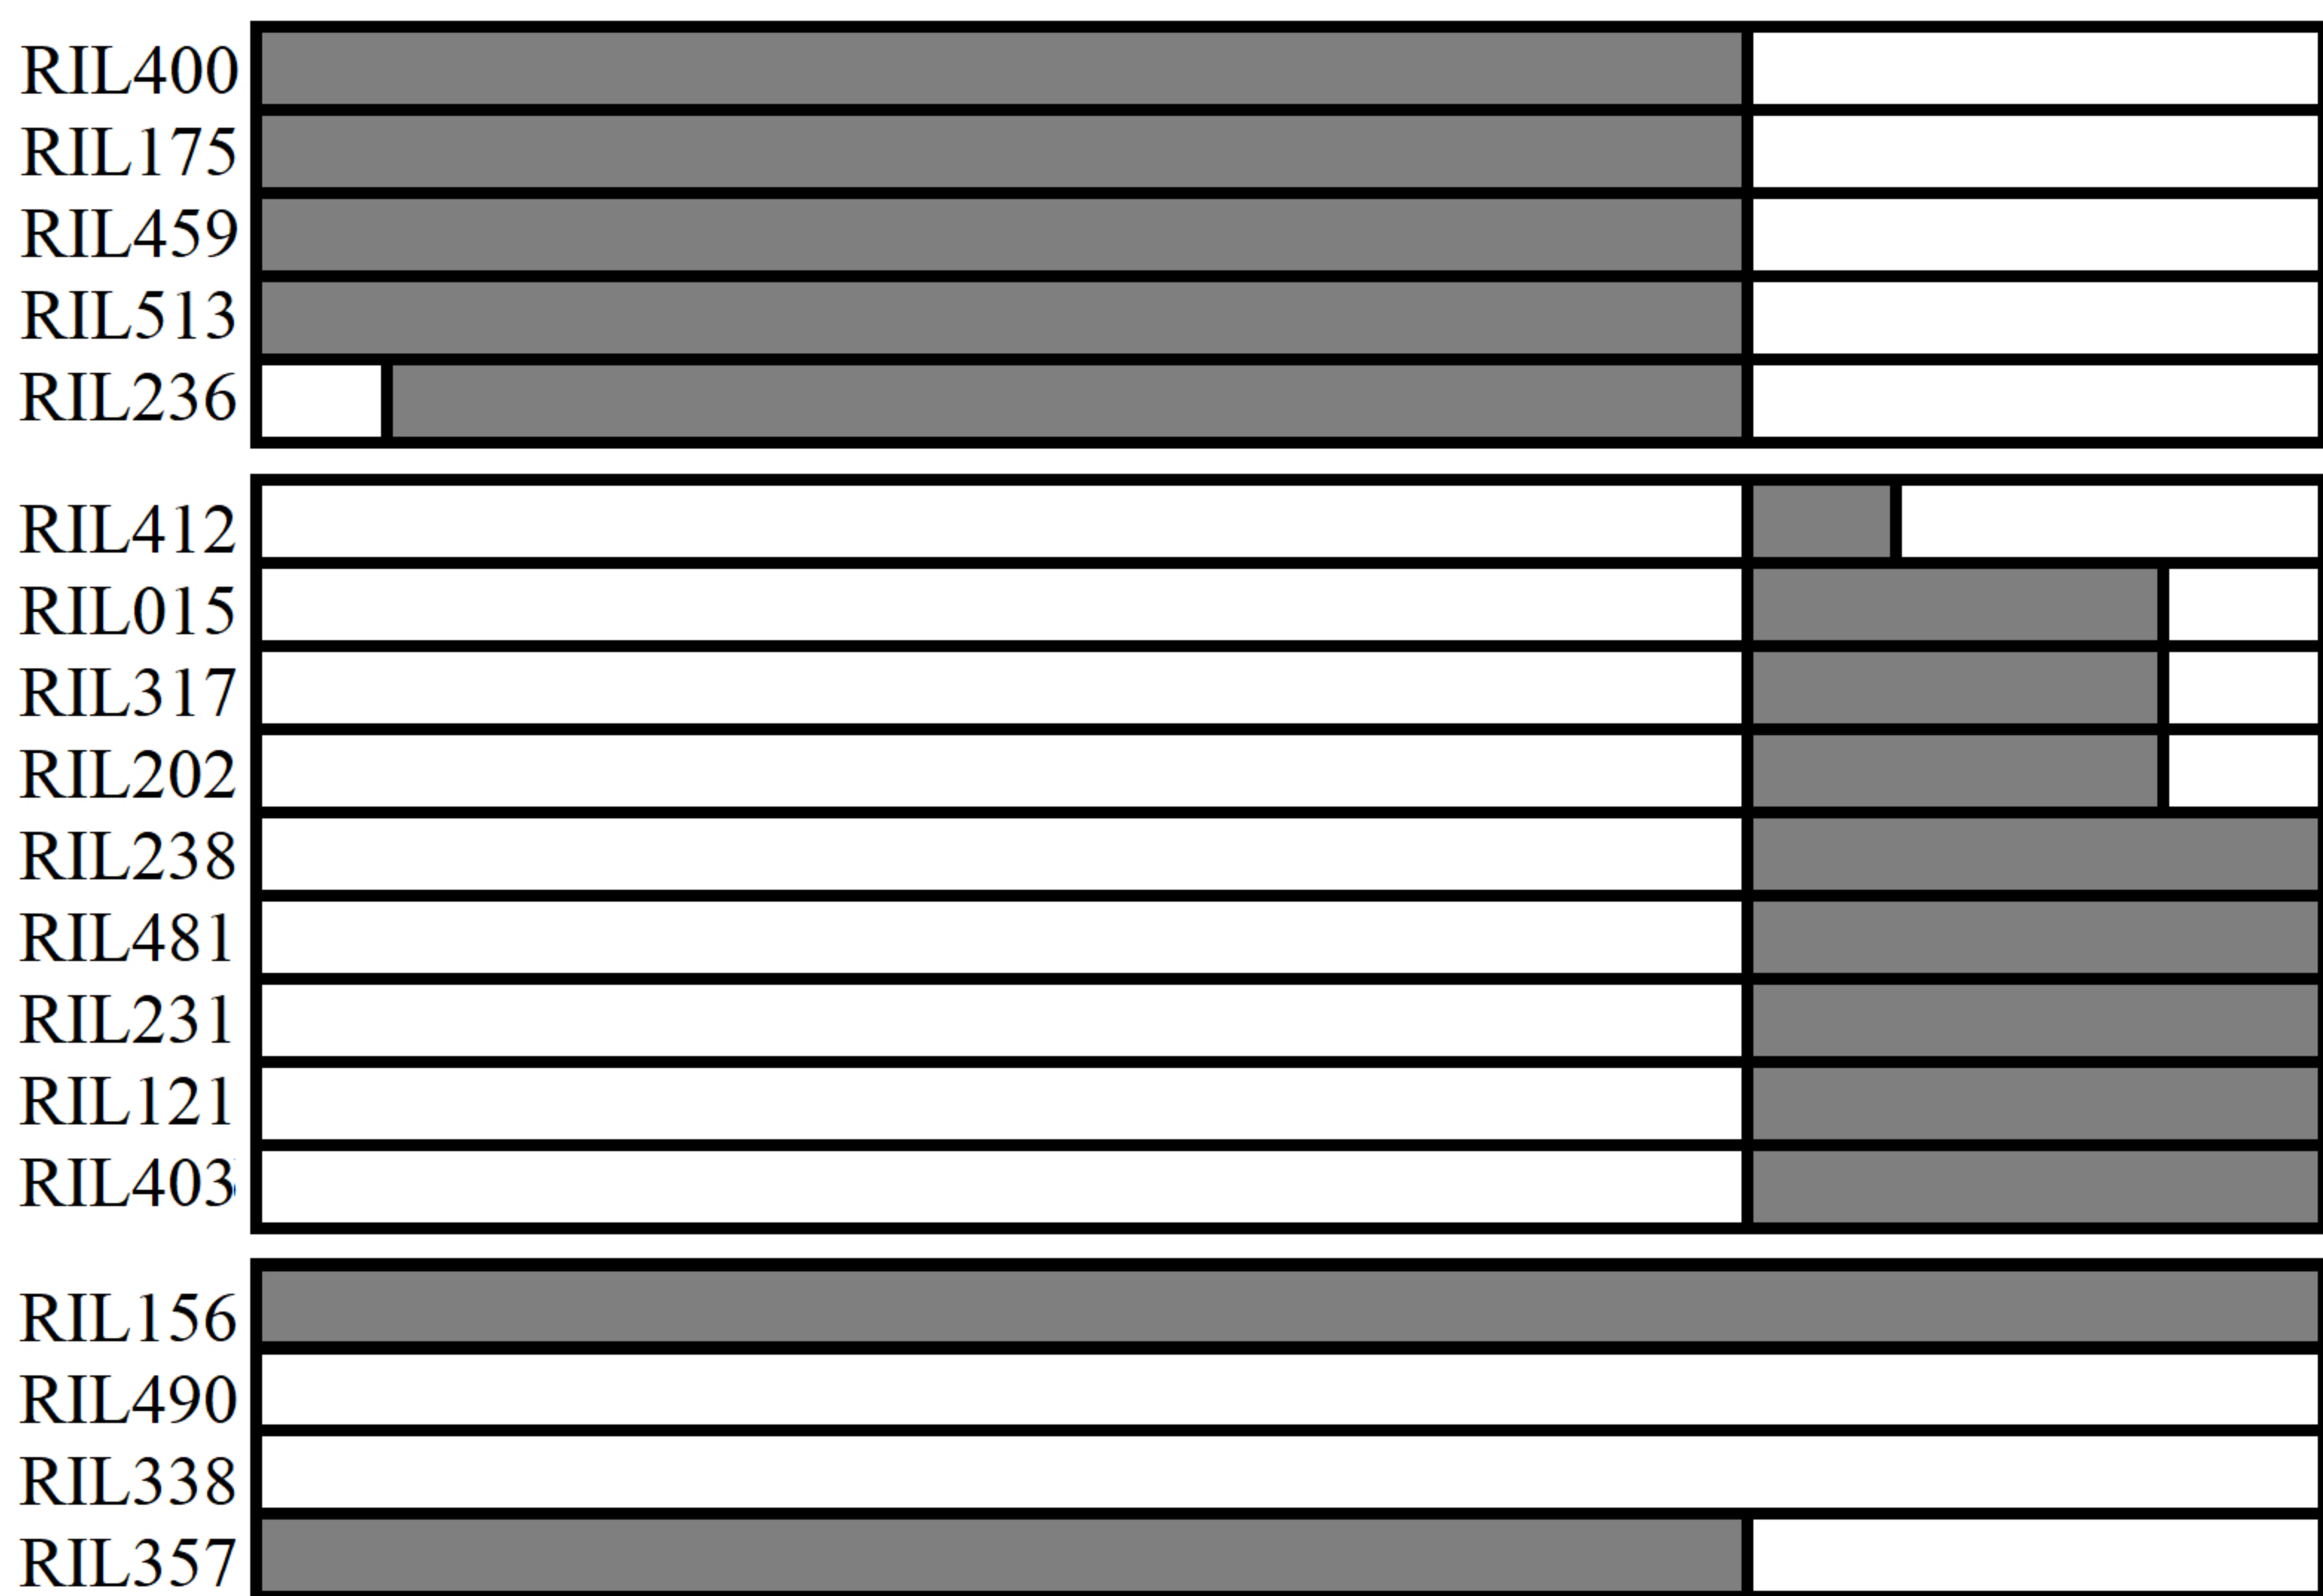**C**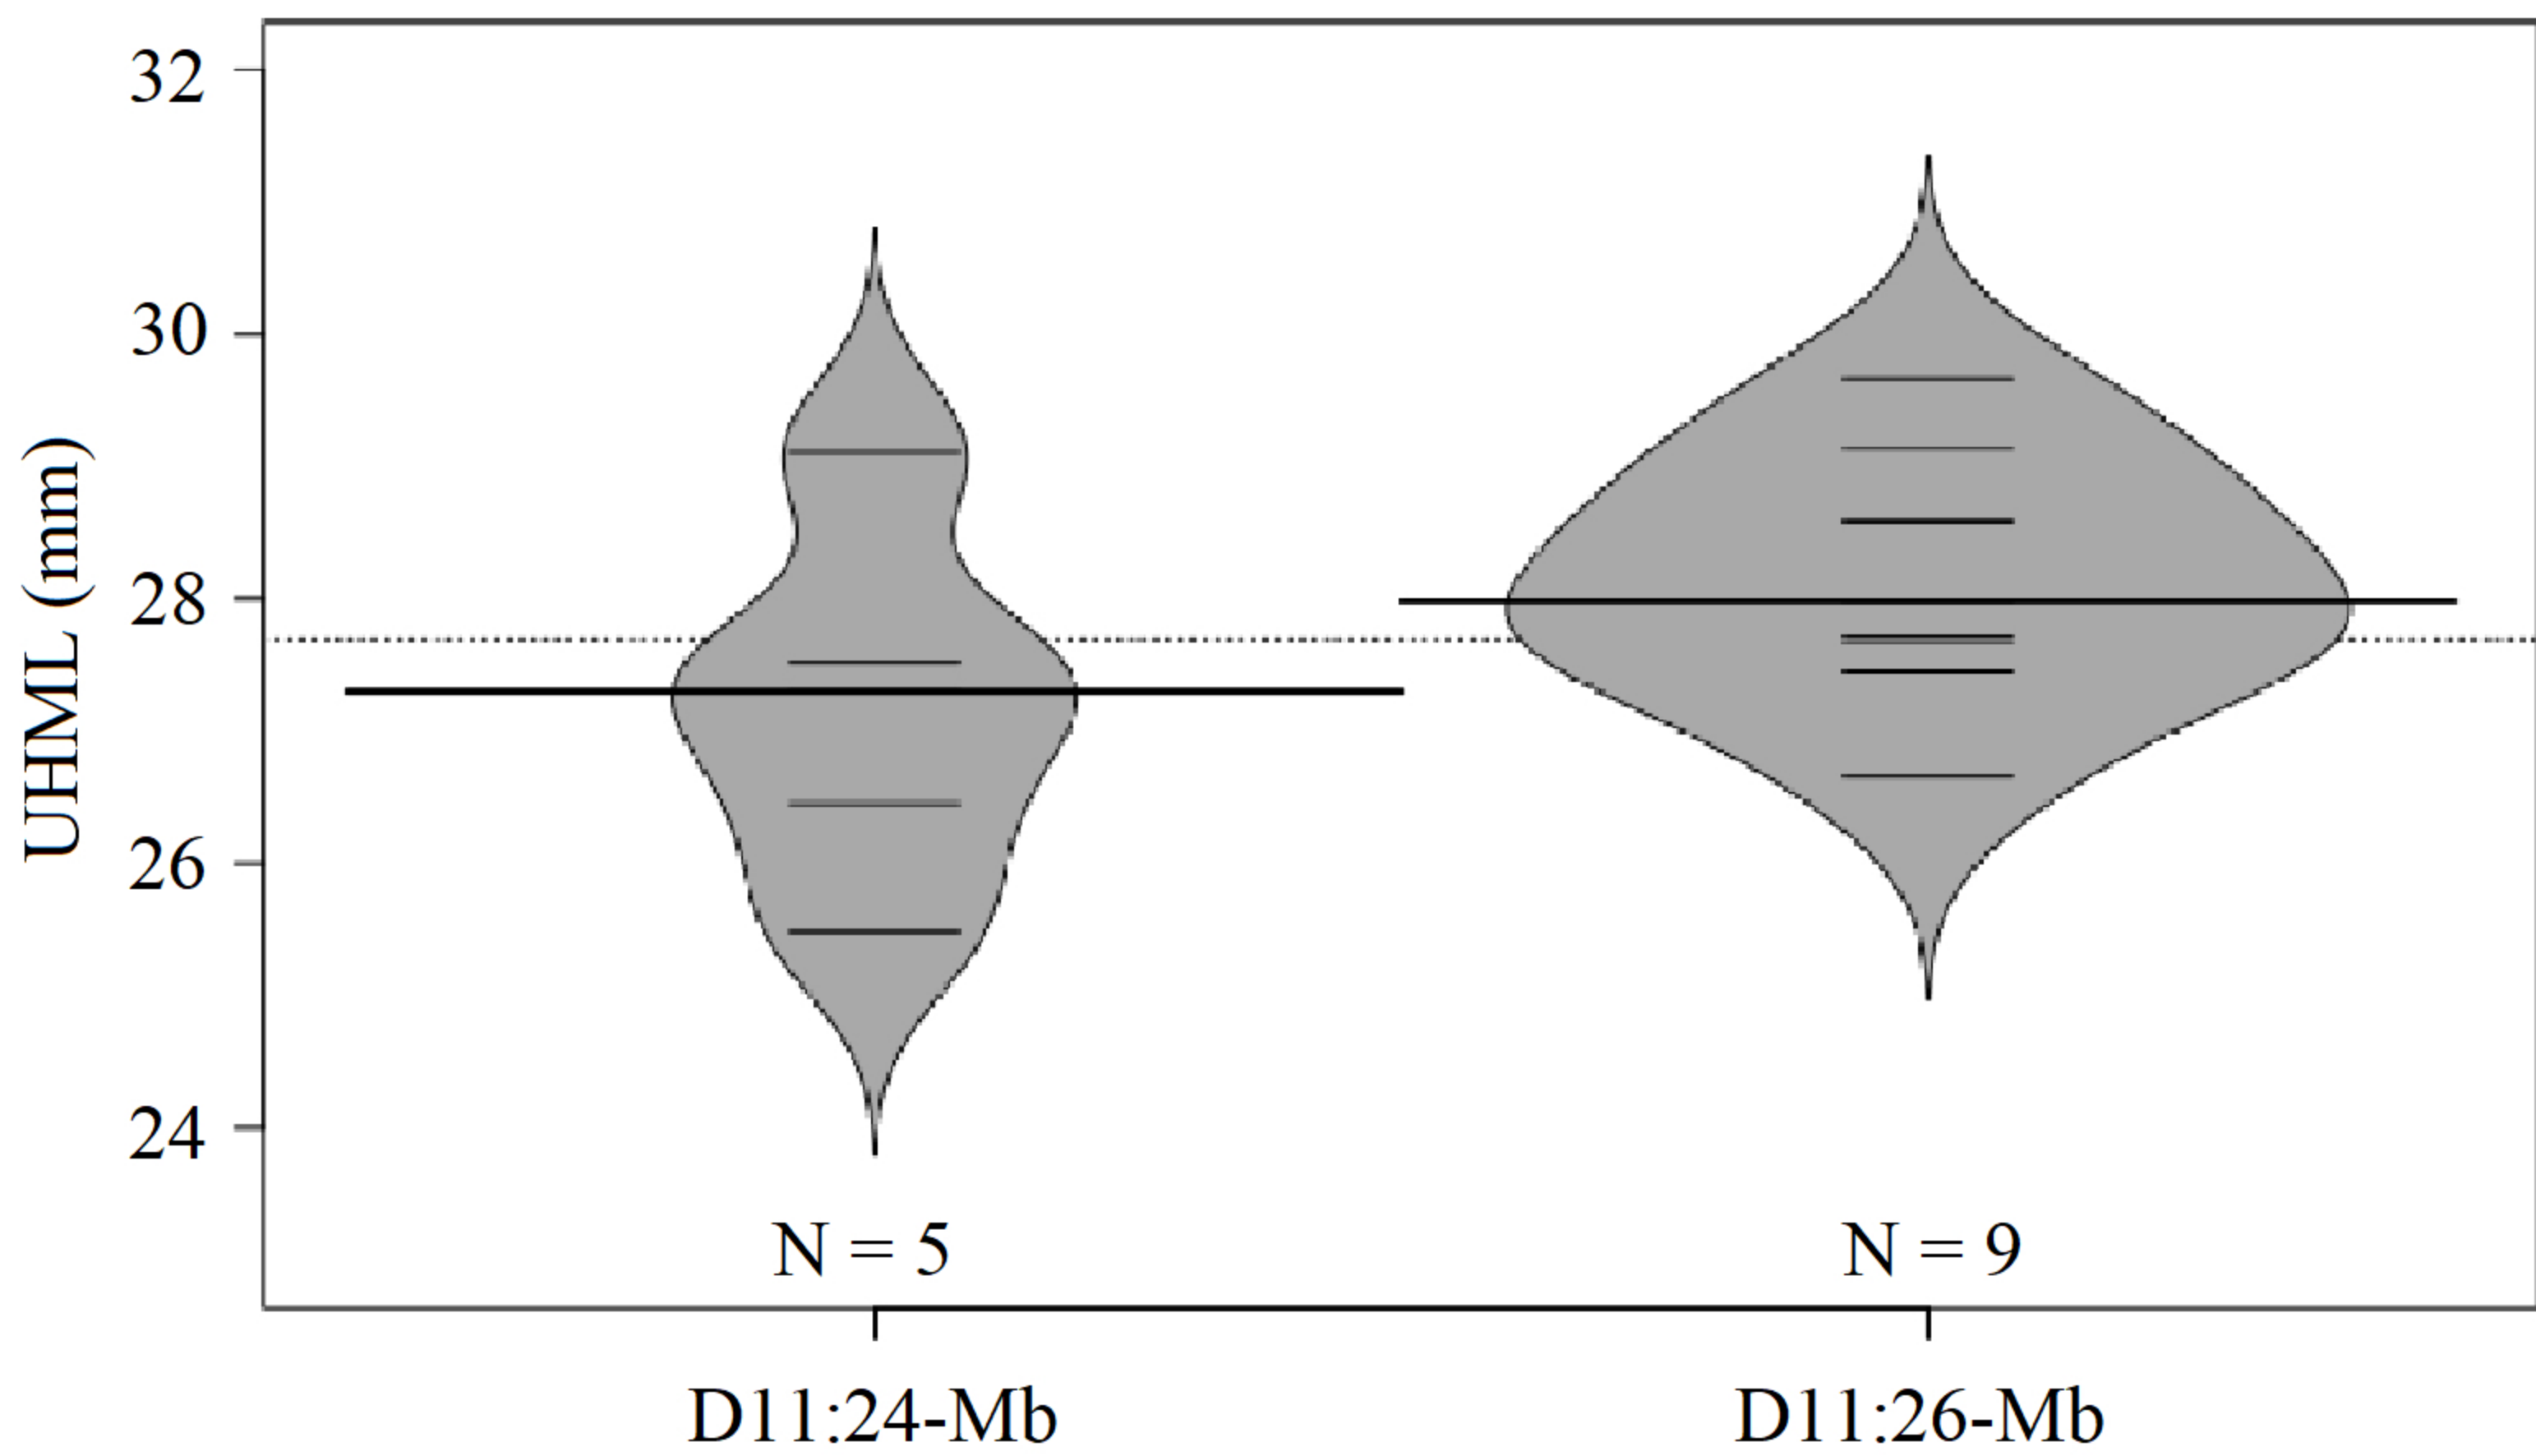

Supplement: 12864_2019_5427_MOESM4_ESM.pdf [file 12864_2019_5427_MOESM4_ESM.pdf]
