# Supplementary material for: Genetic and transcriptomic dissection of the fiber length trait from a cotton (Gossypium hirsutum L.) MAGIC population
Source: BMC Genomics. 2019 Feb 6;20:112. doi: 10.1186/s12864-019-5427-5 (PMC6366115; doi:10.1186/s12864-019-5427-5)
Supplement: Supplementary file 1 — The results of mapping reads. (XLSX 14 kb) [file 12864_2019_5427_MOESM1_ESM.xlsx]

## Sheet: Sheet1
Sample #	Sample ID	Raw reads	Clean Reads	Mapped reads	%
1	N551_BR1	118725658	115810774	66455471	57.3828
2	N551_BR2	125608220	121008700	71959078	59.466
3	N551_BR3	126404776	121440738	71517219	58.8906
4	N552_BR1	100376918	97532912	64540877	66.1734
5	N552_BR2	107796966	104632454	60907335	58.2107
6	N552_BR3	118248782	114849338	69428387	60.4517
7	N553_BR1	110155036	107624270	65994129	61.319
8	N553_BR2	119673028	116910344	68010644	58.1733
9	N553_BR3	106340532	103552826	58885956	56.8656
10	N554_BR1	123805260	119835810	69636630	58.11
11	N554_BR2	116224504	112755922	62609043	55.5262
12	N554_BR3	111808654	109557848	65899898	60.1508
13	N555_BR1	104991092	102671060	60362052	58.7917
14	N555_BR2	115004744	112646350	67064716	59.5356
15	N555_BR3	123958372	121057368	71935166	59.4224
16	N556_BR1	120737946	118165314	69735715	59.0154
17	N556_BR2	109252270	105723632	61665757	58.3273
18	N556_BR3	102806038	97778730	57929612	59.2456
19	N557_BR1	117645122	112189308	67646142	60.2964
20	N557_BR2	125969732	122083698	72671660	59.5261
21	N557_BR3	103869956	100204930	59490324	59.3687
22	N558_BR1	102626822	98887334	58996016	59.6598
23	N558_BR2	124388360	120332926	70259308	58.3874
24	N558_BR3	105785506	100028098	68353186	68.334
25	N559_BR1	103924712	101349106	59688386	58.8938
26	N559_BR2	142208178	136500776	75300018	55.1645
27	N559_BR3	109841314	105623892	63002775	59.6482
28	N560_BR1	125213776	118858016	71801427	60.4094
29	N560_BR2	108608162	105076962	62613885	59.5886
30	N560_BR3	110128316	106337966	63824490	60.0204
31	N561_BR1	122330244	118398854	69355470	58.5778
32	N561_BR2	140035692	134988320	79403026	58.8221
33	N561_BR3	137219446	131279926	77611363	59.119
34	RIL156_BR1	115598536	109851252	65038081	59.2056
35	RIL156_BR2	114400112	108774244	65604782	60.3128
36	RIL156_BR3	124265080	118981812	71672876	60.2385
37	RIL338_BR1	103651142	98672412	59315004	60.1131
38	RIL338_BR2	148803240	141155722	85631645	60.6647
39	RIL338_BR3	102717596	98100996	59010075	60.1524
40	RIL357_BR1	124876376	120196498	72194992	60.0641
41	RIL357_BR2	161532018	157890672	94880512	60.0925
42	RIL357_BR3	103867524	101350010	60727556	59.9186
43	RIL490_BR1	102810782	99726304	59322414	59.4852
44	RIL490_BR2	112361646	109162006	64609968	59.1872
45	RIL490_BR3	112626122	109955286	65799611	59.8422
